# Supplementary material
Source: PubMed Central journal article supplement (PMC7484573)
Supplement: TBSD_A_1802338_SM0078.pdf [file TBSD_A_1802338_SM0078.pdf]

# **Deciphering the Protein Motion of S1 Subunit in SARS-CoV-2 Spike Glycoprotein Through Integrated Computational Methods**

Hao Tian and Peng Tao\*

*Department of Chemistry, Center for Research Computing, Center for Drug Discovery,  
Design, and Delivery (CD<sub>4</sub>), Southern Methodist University, Dallas, Texas, United States  
of America*

E-mail: [ptao@smu.edu](mailto:ptao@smu.edu)

**Supporting Information Available**

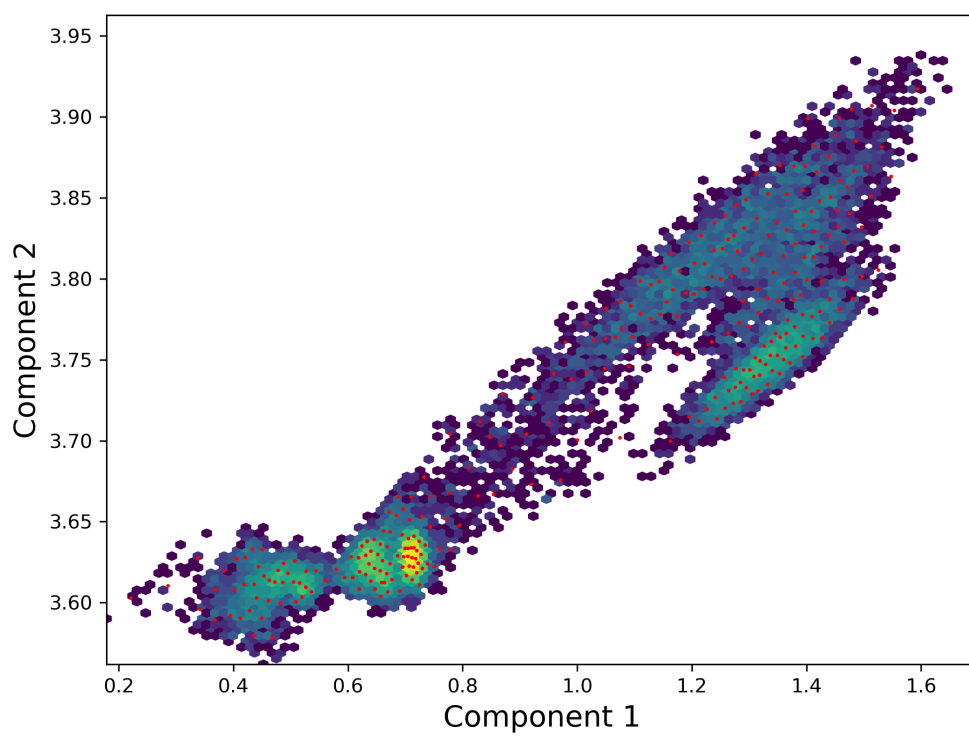

**Figure S1:** MiniBatch k-means clustering results of 300 microstates shown in red dots.

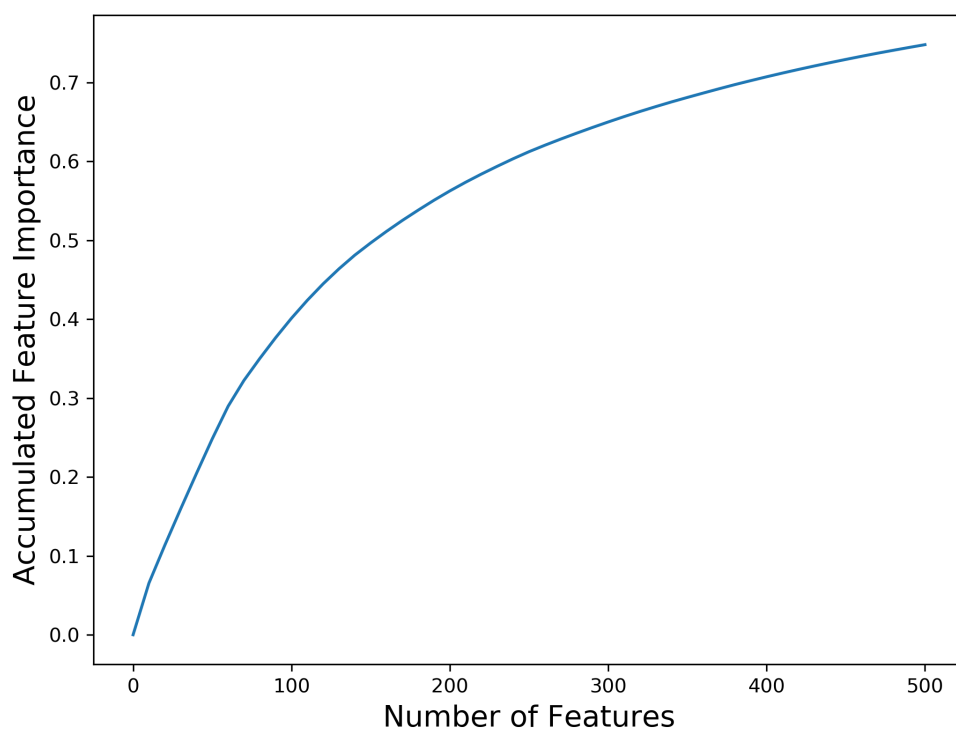

**Figure S2:** Accumulated feature importance of the top 500  $C\alpha$  distances.

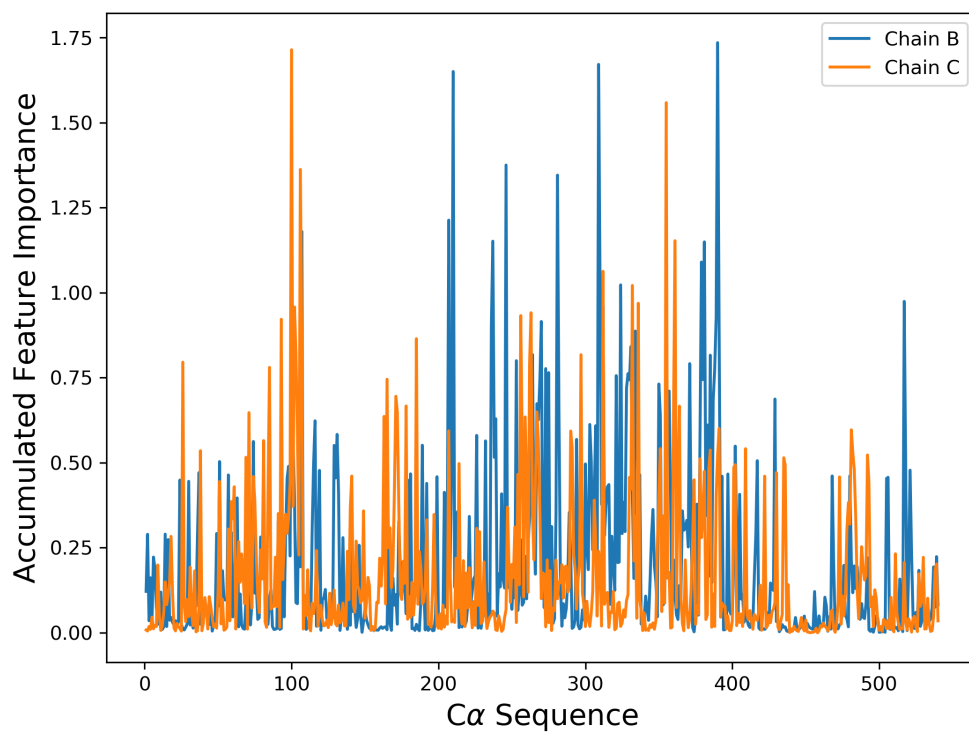

**Figure S3:** Accumulated residue importance in chain B (blue) and C (orange), respectively.
